# Supplementary material
Source: Springer Nature journal article supplement (https://www.springermedizin.de/resource/supplementary/12990_2011_411_MOESM3_ESM.pdf/9613220)

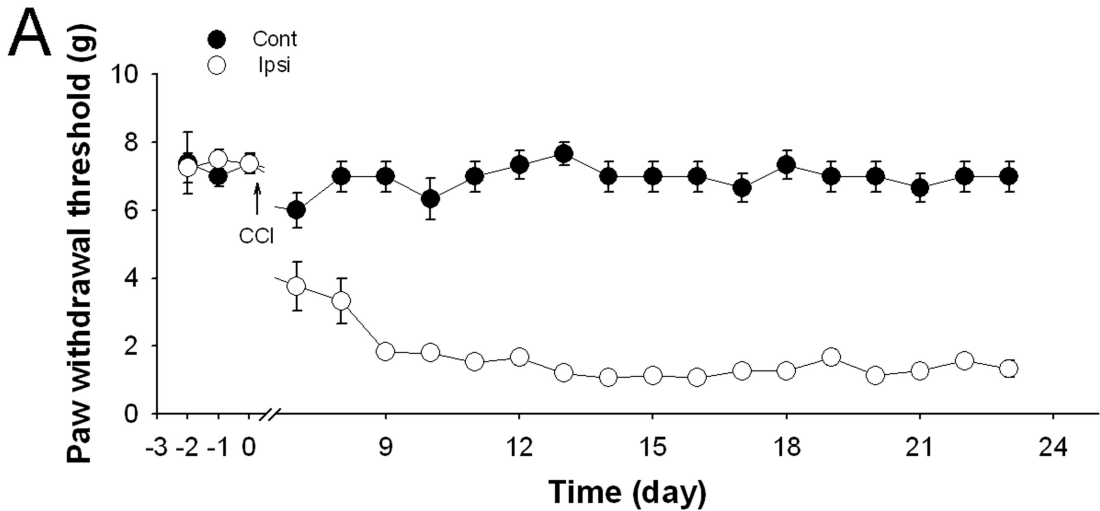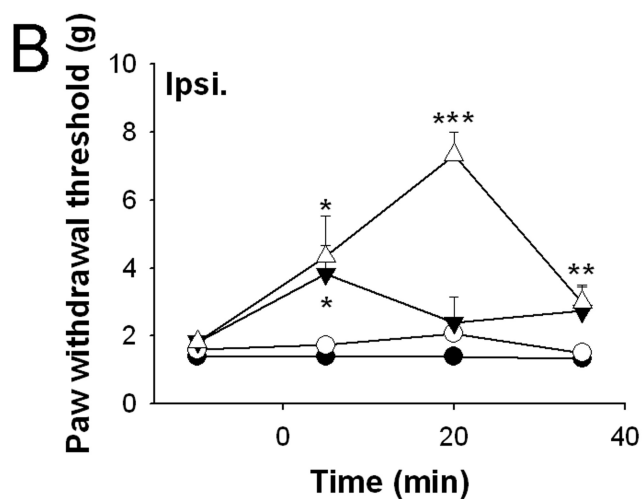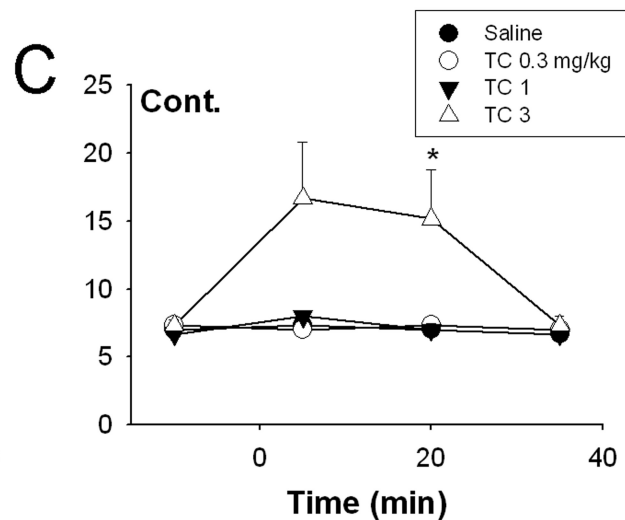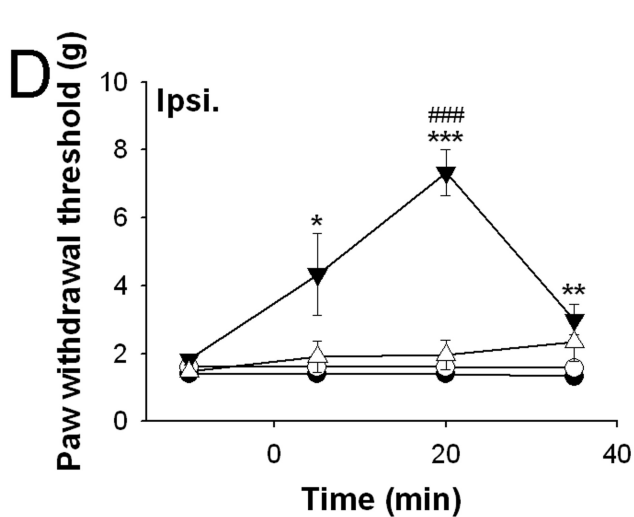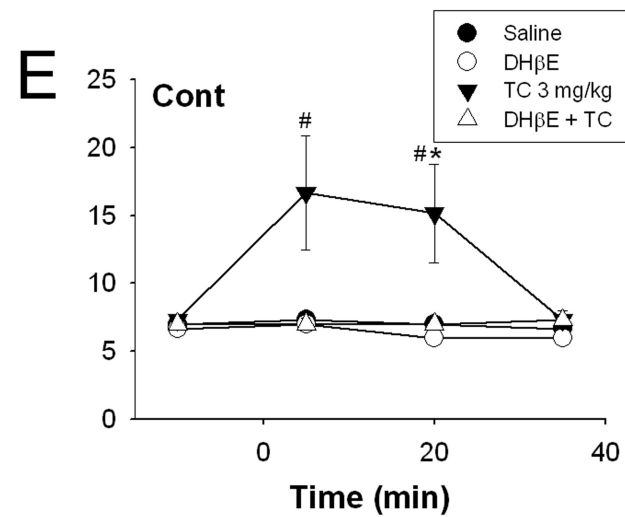

Supplement: MOESM3 [file 9613220]
